# Supplementary material for: The SP19 Chronology for the South Pole Ice Core – Part 1: Volcanic matching and annual-layer counting
Source: Copernicus journal article supplement (doi:10.5194/cp-2019-61), 2019-06-05
Supplement: Supplementary file 2 [file cp-2019-61-supplement.pdf]

# 1 Supplemental Information

## 2 S1. Annual Layer Counting Methods

3 Layer counting was done in two phases. The first phase spans 5 to 540 m depth  
4 and the second phase includes 540 to 798 m depth. The specific annual-layer counting  
5 procedure is described for each phase.

### 6 *S1.1 Layer Counting from 5-540 meters*

7 Above 540 m, all five interpreters independently picked annual layers using the  
8 glaciochemical time series described above. These efforts resulted in five separate  
9 timescales. Over the top 540 m of SPICEcore, the different interpreters identified  
10 between 6529 and 6807 years, with sometimes inconsistent offsets between the  
11 interpreters. These five timescales are plotted in Figure S1 with respect to a timescale  
12 passing through each of the tie points developed in section 3.2, with positive values  
13 indicating that layer counts are missing in order to synchronize ages with WAIS Divide  
14 (blue lines). To combine the 5 sets of timescales into a single unified timescale, we first  
15 identified clusters of individual layer picks. For depths above 540 m, we calculated the  
16 sum of the number of individual layer picks within a moving window +/- 2 cm wide at  
17 0.5 cm increments. In an ideal scenario, with all 5 researchers picking a layer in the same  
18 position, reconciliation among the sets of picks is simple (Fig. 6A). However, in some  
19 areas choosing between the 5 sets of picks is non-trivial (Fig. 6B). DW and DF  
20 individually and independently reviewed the five sets of picks using independently  
21 established criteria to decide whether each cluster of picks represented a year for  
22 inclusion within the timescale or not. These decisions generated two new sets of  
23 timescales containing 6791 and 6856 years within the top 540 m (Figure S1, black  
24 dashed). While eliminating most of the discrepancies among the five interpreters, there  
25 remained a difference of 65 years (1%) and 481 specific locations in the core where DW  
26 and DF made different choices about the presence of an annual demarcation. DW made  
27 one final round of choices after investigating the chemical stratigraphy surrounding each  
28 of these years to reconcile the remaining differences into a single timescale containing  
29 6826 years above 540 m (Figure S1, red). For comparison, roughly 6932 years would be  
30 expected between 5 and 540 m based on volcanic synchronization, indicating that our  
31 layer counting missed at least 106 years out 6932 (1.5%).  
32

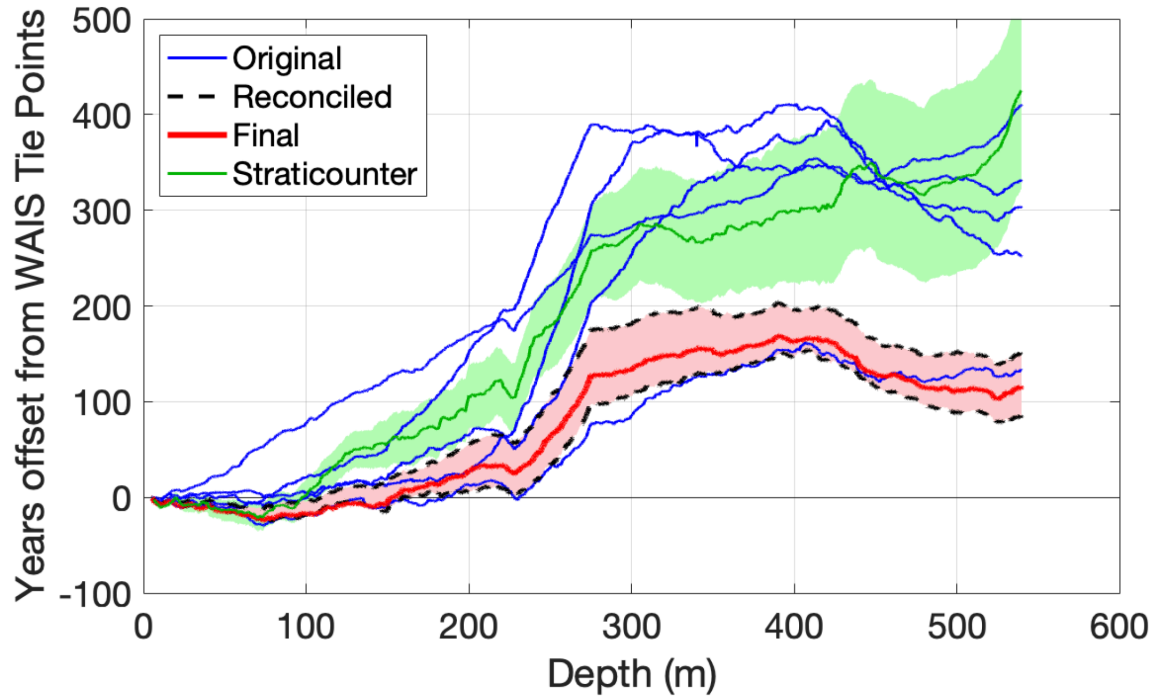

33  
 34 Figure S1: Offset between annual layer counting and SPICEcore-WAIS Divide tie points.  
 35 Positive values on the y-axis indicate younger SPICEcore layer count ages relative to the  
 36 synchronization with WAIS Divide (i.e. interpreters were missing years). Each blue line  
 37 represents one of the 5 original independent sets of layer counts. The dashed black lines  
 38 show the reconciled layer counted timescales after independent merging of the five  
 39 original sets of picks by DW and DF. The red line indicates the final independent layer  
 40 counted timescale. The green line shows the offset from SPICEcore-WAIS Divide tie  
 41 points of automated layer counting using Straticounter (Winstrup et al. 2012) with the  
 42 green shading inclusive of the 5<sup>th</sup> to 95<sup>th</sup> percentile ages. All of the layer counting efforts  
 43 depicted were done independently of the stratigraphic tie points. All interpreters  
 44 undercounted years, particularly during the interval from 228 to 275 m depth.

45  
 46

### ***S1.2 540-798 meters***

47 Between 540 and 798 m, sampling resolution permitted further annual layer  
 48 counting. One interpreter (DW) continued the counting to 798 m, below which point  
 49 annual layers were not consistently detectable. DW counted 4597 layers between 540  
 50 and 798 m, leading to an initial age of 11321 BP at the bottom of the annually dated  
 51 section of the core.

52

### ***S1.3 Sections with Missing Data***

53 *S1.3.1 Gaps and Damaged Core* Within the top 798 m, where layer counting took place,  
 54 there is a total of 2.74 m with missing data due to poor core quality or melter system  
 55 errors. To fill these gaps in the timescale, we assigned an annual layer spacing equal to  
 56 the average annual layer thickness of the 10 years above and below the gap. Layer  
 57 thicknesses within the gap were rounded to make an integer number of equally spaced  
 58 years. In total, 31 years were interpolated using this procedure.

59 *S1.3.2 Dating the Top 5 meters* The SPICEcore chemistry dataset begins at 5.15 m below  
60 the surface. We used chemistry from a hand-augered (HA) core drilled near the  
61 SPICEcore drill site to date the uppermost firn. The HA core was recovered from the  
62 surface to a depth of 9.86 m during the 2014/2015 field season; the same time as the  
63 beginning of SPICEcore drilling. The short length allows us to date the HA core with  
64 extra care using the following measurements: chloride, sulfate, sodium, magnesium,  
65 liquid conductivity, particle counts (small channel),  $\text{Cl}^-/\text{Na}^+$  and  $\text{SO}_4^{2-}/\text{Na}^+$ . Layer  
66 counting of the HA core indicates a date at 5.15 m between 1992 and 1993 (5.03=1993,  
67 5.29=1992). The nearest volcanic tie point to the top of SPICEcore is at 10.58 m depth  
68 with an age of -14 years before 1950 (1964 CE).

#### 69 *S1.4 Validation with Straticounter*

70 We performed a semi-independent check on our manual layer counting ability  
71 using Straticounter, an automated layer counting software package described in  
72 (Winstrup et al. 2012). This software has been used to aid in the dating of previous ice  
73 cores in Greenland (Winstrup et al. 2012), Antarctica (Sigl et al. 2016), and Alaska  
74 (Winski et al. 2017). We used the Straticounter program to identify annual layers within  
75 the top 540 m of SPICEcore given sodium, magnesium, sulfate and microparticle data, as  
76 well as the reconciled version of our layer counts. Results produce ages ranging from  
77 6408 to 6615 years between 5-540 m, agreeing closely with 4 of the 5 interpreters, but  
78 differing from the stratigraphically matched timescale by approximately 250-500 years  
79 (Figure S1, green). Because of the scrutiny applied to the manual layer counting efforts,  
80 and because the reconciled version of the hand-picked annual layer chronology is closer  
81 to the stratigraphically coordinated timescale, we use the manual layer counts to  
82 interpolate between tie points.

## 83 **S2. Reconciling Layer Counts with Stratigraphic Ties**

84 To a depth of 798 m, 86 volcanic tie points to WAIS Divide were identified,  
85 bracketing 85 depth intervals within which a known number of years must be present. To  
86 make the layer-counted timescale consistent with these tie points, years were added or  
87 subtracted, as necessary, within each interval such that the layer-counted timescale passes  
88 through each tie point within +/- 1 year of its age, linking SPICEcore with the WAIS  
89 Divide WD2014 chronology. In most intervals, very few years (1-5) needed to be added  
90 or subtracted, although in certain sections layer counting consistently differed from the  
91 WAIS-tied timescale. For instance, 105 years are missing between 228 and 275 m while  
92 78 extra years were counted between 626 and 687 m. Because of the different counting  
93 methods, procedures for adding and subtracting years differ above and below 540 m and  
94 are described separately.

95 Above 540 m, years were preferentially added or subtracted where DF and DW  
96 disagreed in their final reconciliation (see Section S1.1). If an interval required the  
97 addition or subtraction of a number of years that exceeded the number of disagreements  
98 between DF and DW within the same interval, we first added years with 5 picks, then 4,  
99 then 3, then 2, then 1 until we met the required number of years within each interval (the  
100 opposite order applying to the subtraction of years). Between 540 and 798 m only one  
101 interpreter (DW) picked layers, so positions where years were added or subtracted were

102 selected manually. After adding or subtracting the appropriate number of years within  
103 each interval, the layer-counted timescale passes within +/- 1 year of each stratigraphic  
104 tie point. The Holocene layer-counted timescale is then merged with the Pleistocene  
105 smoothest annual layer thickness interpolated timescale (Fudge et al. 2014) to form the  
106 final SP19 timescale.

107

### 108 S3. Layer Counting Performance

109 Using multiple interpreters to develop the timescale provides the ability to assess  
110 which areas contain better agreement among the different sets of picks. We assume that  
111 our layer count chronology is more robust in regions where all 5 sets of picks agree (e.g.  
112 Fig. 6A) than in regions with high discrepancy among picks (e.g. Fig. 6B). We create the  
113 following index of layer count quality using the following rules: For picks where all  
114 interpreters assigned a year within +/- 2 cm, we assign a value of 1. For picks where there  
115 was disagreement among the five interpreters, but agreement between DW and DF while  
116 reconciling, we assign a value of 0. For picks where there was disagreement between  
117 DW and DF while reconciling, we assign a value of -1. By calculating smoothed values  
118 of the layer count quality index over the top 540 m, patterns emerge showing areas of  
119 higher and lower layer counting confidence (Fig. S2). Most notable is the section  
120 between 412 and 456 m (5100 to 5700 BP) where analytical issues obscured robust  
121 annual signals. Fortunately, this section is well constrained by volcanic events. The very  
122 low accumulation values centered on 2400 BP are associated with another interval of  
123 slightly lower certainty in our layer counting ability. This is partly due to a lack of  
124 stratigraphic tie points, but the low accumulation here also caused all interpreters to  
125 consistently undercount years (between 228 and 275 m) leading to greater potential  
126 uncertainties.

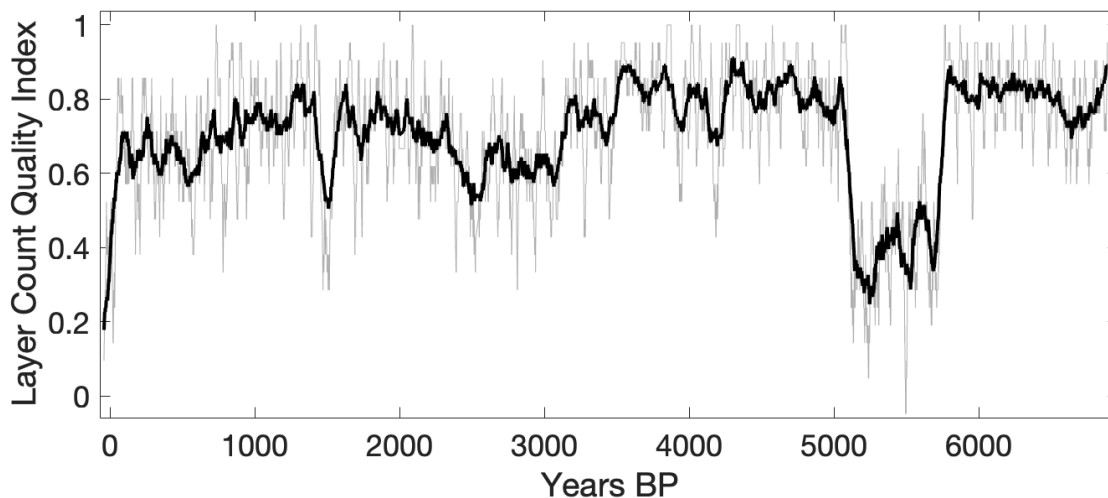

127

128 Figure S2: An index of layer counting quality over time. Higher values indicate greater  
129 confidence in layer counting ability. The index reflects the level of agreement among the  
130 five interpreters (see text). The 20-year (light gray) and 100-year (bold) running means  
131 are shown.

132

133 **S4. Interval from 180 – 275 meters**

134 We have identified only one tie point in the interval from 180m to 275m. Both  
135 interpreters (TJF, DF) have spent considerable time examining this interval but have not  
136 consistently identified the same events. The challenge of matching volcanic events in this  
137 period has two primary causes: 1) a sharp change in accumulation rate and 2) numerous  
138 small volcanic events. These two factors combine to make it difficult to distinguish  
139 sequences of volcanic eruptions because the depth between events may be varying due to  
140 the change in accumulation rather than a change in duration, and because there is no  
141 distinct pattern to relative amplitudes of the events. One interpreter revisited this interval  
142 to make another round of volcanic matches, which were made without any direct  
143 information from the annual interpolation. These matches indicate a similar timescale to  
144 the annual interpretation, which can be seen in Figure S3 of the average annual layer  
145 thickness. However, the second interpreter did not find the same matches when revisiting  
146 the interval and thus we exclude them from the underlying timescale.

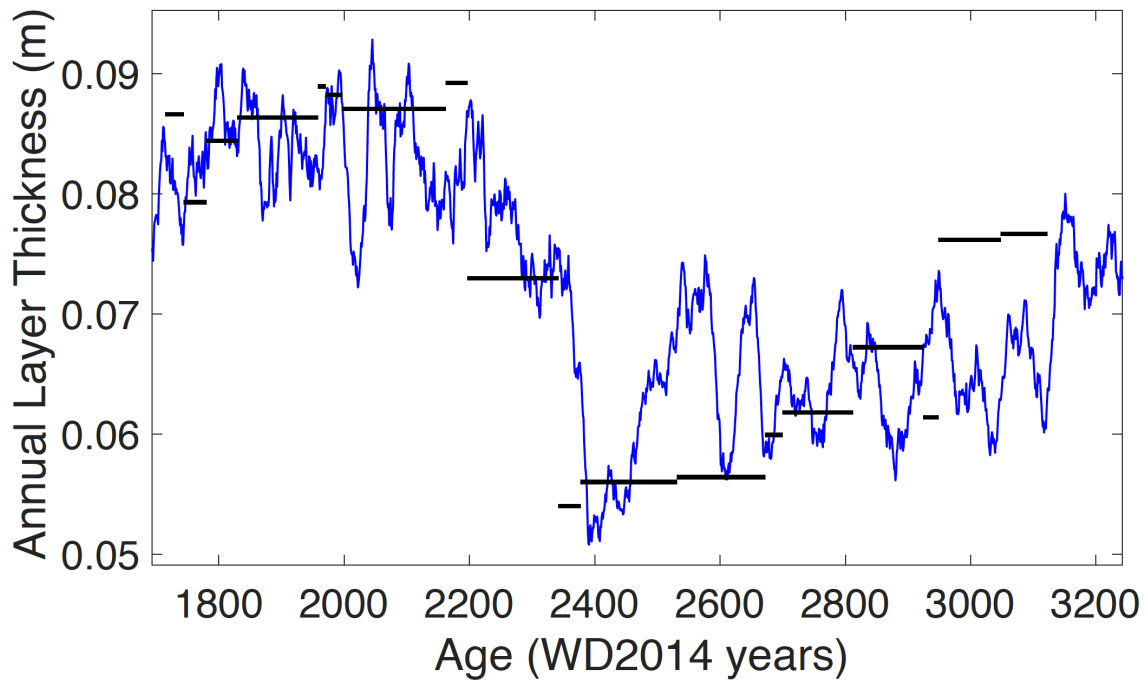

147  
148 Figure S3: Annual layer thickness comparison between the SP19 timescale (blue –  
149 smoothed) and independent volcanic matches to WAIS-Divide (black). The volcanic  
150 matches were made without reference to the annual layer counts yet show a very similar  
151 pattern of annual layer thickness, further improving confidence in an accumulation  
152 anomaly at this time.
